CORRECTION

## Correction: A diel multi-tissue genome-scale metabolic model of *Vitis vinifera*

Marta Sampaio, Miguel Rocha, Oscar Dias

There are errors in the Funding statement. The correct Funding statement is as follows: Portuguese Foundation for Science and Technology (FCT) supported this work under the scope of the strategic funding of UID/BIO/04469/2020 unit and the PhD scholarship (SFRH/BD/144643/2019) to M.S. FCT also celebrated an Assistant Research contract with O.D. obtained under CEEC Individual 2018 (DOI 10.54499/CEECIND/03425/2018/CP1581/CT0020). This study was also supported by LAB-BELS - Associate Laboratory in Biotechnology, Bioengineering and Microelectromechanical Systems, LA/P/0029/2020. The funders had no role in study design, data collection and analysis, decision to publish, or preparation of the manuscript.

### Reference

1. Sampaio M, Rocha M, Dias O. A diel multi-tissue genome-scale metabolic model of *Vitis vinifera*. PLoS Comput Biol. 2024;20(10):e1012506. <https://doi.org/10.1371/journal.pcbi.1012506> PMID: [39388487](https://pubmed.ncbi.nlm.nih.gov/39388487/)

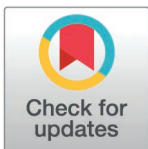

### OPEN ACCESS

**Citation:** Sampaio M, Rocha M, Dias O (2026) Correction: A diel multi-tissue genome-scale metabolic model of *Vitis vinifera*. PLoS Comput Biol 22(3): e1014135. <https://doi.org/10.1371/journal.pcbi.1014135>

**Published:** March 27, 2026

**Copyright:** © 2026 Sampaio et al. This is an open access article distributed under the terms of the [Creative Commons Attribution License](https://creativecommons.org/licenses/by/4.0/), which permits unrestricted use, distribution, and reproduction in any medium, provided the original author and source are credited.
